# Supplementary material
Source: HighWire-hosted journal article supplement (https://www.annfammed.org/highwire/filestream/8553/field_highwire_adjunct_files/0/Makaroff_Supp_Figs_1-2.pdf)

## Supplemental materials for:

Makaroff LA, Xierali IM, Petterson SM, Shipman SA, Puffer JC, Bazemore AW. Factors influencing family physicians' contribution to the child health care workforce. *Ann Fam Med*. 2014;12(5):427-431.

---

Figure 1. Variation in local supply of pediatricians.

### Variation in Local Supply of Pediatricians

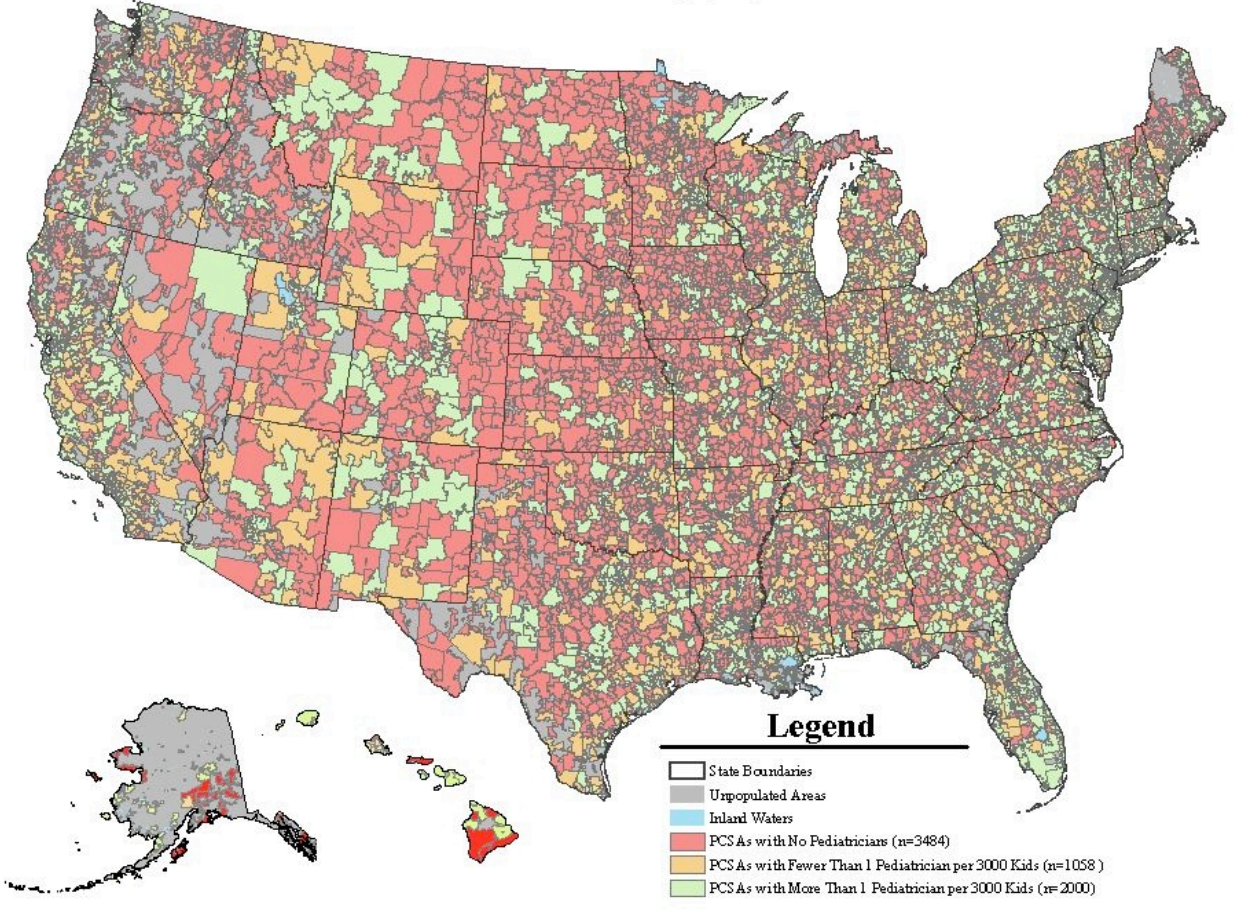

Figure 2. Variation in local supply of all child physicians.

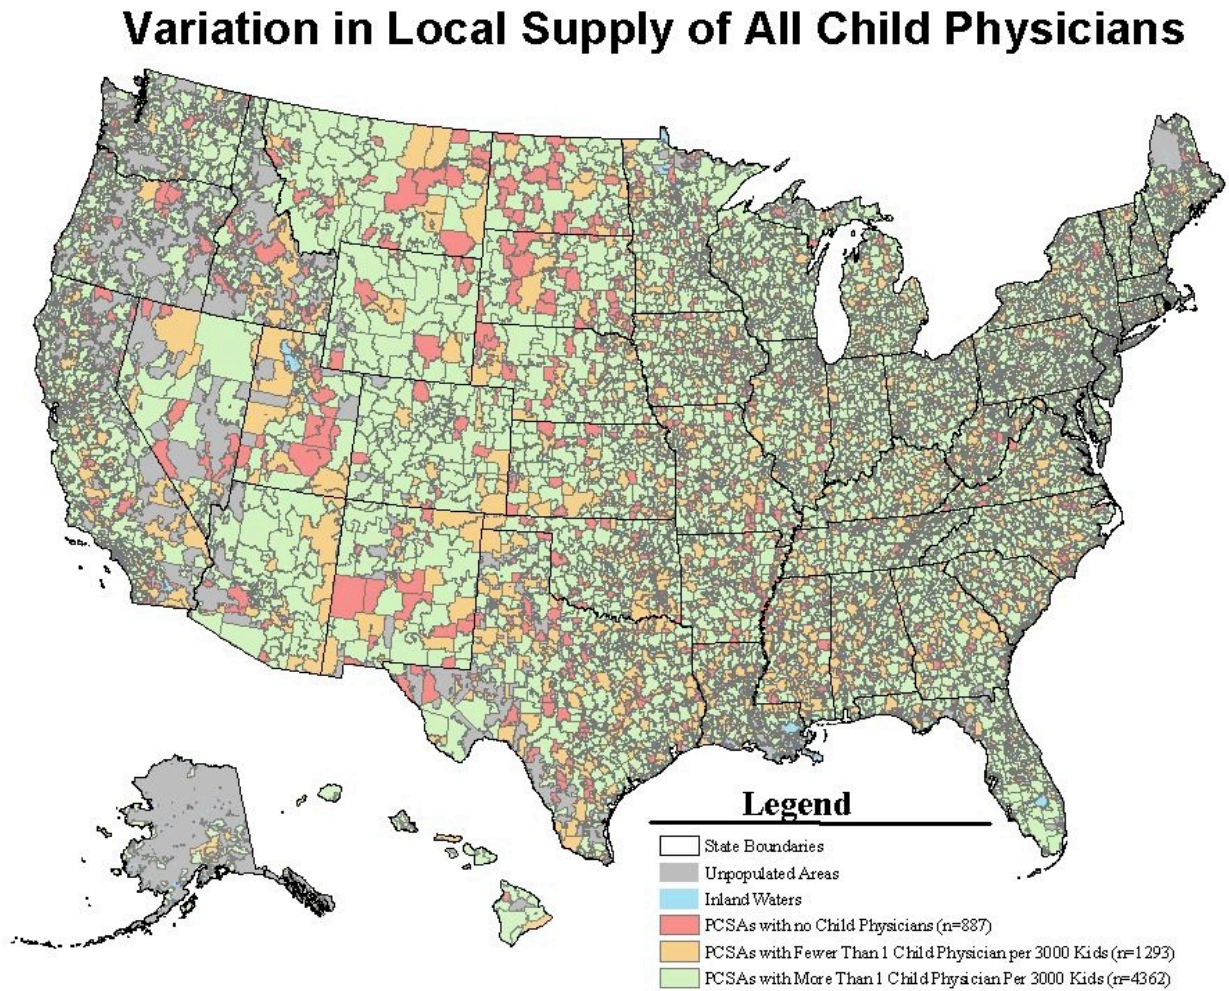

Supplement: Makaroff_Supp_Figs_1-2.pdf [file Makaroff_Supp_Figs_1-2.pdf]
